# Supplementary material for: Accuracy of methods for reporting inorganic element concentrations and radioactivity in oil and gas wastewaters from the Appalachian Basin, U.S. based on an inter-laboratory comparison
Source: Royal Society of Chemistry journal article supplement (doi:10.1039/c8em00359a), 2018-11-19
Supplement: c8em00359a1.pdf [file c8em00359a1.pdf]

**Supporting information for accuracy of methods for reporting inorganic element concentrations and radioactivity in oil and gas wastewaters from the Appalachian Basin, U.S. based on an inter-laboratory comparison**

Tasker, T.L.<sup>a\*</sup>, Burgos, W.D.<sup>a</sup>, Ajemigbitse, M.A.<sup>a</sup>, Lauer, N.E.<sup>b</sup>, Gusa, A.V.<sup>c</sup>, Kuatbek, M.<sup>d,e</sup>, May, D.<sup>f</sup>, Landis, J.D.<sup>g</sup>, Alessi, D.S.<sup>h</sup>, Johnsen, A.M.<sup>d</sup>, Kaste, J.M.<sup>i</sup>, Headrick, K.<sup>j</sup>, Wilke, F.D.H.<sup>k</sup>, McNeal, M.<sup>l</sup>, Engle, M.<sup>m</sup>, Jubb, A.M.<sup>m</sup>, Vidic, R.<sup>c</sup>, Vengosh, A.<sup>b</sup>, Warner, N.R.<sup>a</sup>

<sup>a</sup>Department of Civil and Environmental Engineering, The Pennsylvania State University, 212 Sackett Building, University Park, Pennsylvania 16802, United States

<sup>b</sup>Division of Earth and Ocean Sciences, Nicholas School of the Environment, Duke University, Durham, North Carolina 27708, United States

<sup>c</sup>Department of Civil and Environmental Engineering, University of Pittsburgh, Pittsburgh, Pennsylvania 15213, United States

<sup>d</sup>Radiation Science and Engineering Center, The Pennsylvania State University, 101 Breazeale Nuclear Reactor, University Park, Pennsylvania 16802, United States

<sup>e</sup>Department of Mechanical and Nuclear Engineering, The Pennsylvania State University, 137 Reber Building, University Park, Pennsylvania, 16802, United States

<sup>f</sup>State Hygienic Laboratory, University of Iowa, 2490 Crosspark Road, Coralville, Iowa 52241, United States

<sup>g</sup>Department of Earth Sciences, Dartmouth College, 6105 Fairchild Hall, Hanover, New Hampshire 03755, United States

<sup>h</sup>Department of Earth and Atmospheric Sciences, University of Alberta, 1-26 Earth Sciences Building, Edmonton, Alberta T6G 2E3, Canada

<sup>i</sup>Department of Geology, The College of William & Mary, Williamsburg, Virginia 23185, United States

<sup>j</sup>Maxxam Analytics, 6790 Kitimat Road, Unit 4, Mississauga, Ontario L5N 5L9, Canada

<sup>k</sup>Helmholtz Centre Potsdam – German Centre for Geosciences (GFZ), Telegrafenberg, Potsdam 14473, Germany

<sup>l</sup>ACZ Laboratories, Inc., 2773 Downhill Drive, Steamboat Springs, Colorado 80487, United States

<sup>m</sup>U.S. Geological Survey, 12201 Sunrise Valley Drive, Reston, Virginia 20192, United States

\*Corresponding author

Table S1. Methods used for cation and anion analyses. Numbers below each lab identification represents the different types of equipment used by individual labs including ICP-MS/MS (identified as 1), ICP-MS (2), Direct Plasma Spectrometry (3), ICP-OES (4), XRF (5), Neutron Activation (6), or Ion chromatography (7).

| Analyte | L1 | L2 | L3 | L4 | L5 | L6 | L7 | L8 | L9 | L10 | L11 | L13 | L13 | L14 | L15 |
|---------|----|----|----|----|----|----|----|----|----|-----|-----|-----|-----|-----|-----|
| Li      | 1  | 2  |    | 2  | 4  | 4  | 4  | 4  | 2  | 4   |     | 4   |     | 2   | 6   |
| B       | 1  |    |    | 2  | 4  | 4  |    | 2  | 2  | 4   |     | 4   |     | 2   | 6   |
| Na      | 1  |    | 7  | 3  | 4  | 4  | 4  | 4  | 2  | 4   | 5   | 4   |     | 4   | 6   |
| K       | 1  | 2  | 7  |    | 4  | 4  | 4  | 4  | 2  | 4   | 5   | 4   |     |     | 6   |
| Mg      | 1  | 2  | 7  | 3  | 4  | 4  | 4  | 4  | 2  | 4   | 5   | 4   |     | 4   | 6   |
| Ca      | 1  | 2  | 7  | 3  | 4  | 4  | 4  | 4  | 4  | 4   | 5   | 4   |     | 4   | 6   |
| Sr      | 1  | 2  | 7  | 3  | 4  | 4  | 4  | 4  | 2  | 4   | 5   | 4   |     | 4   | 6   |
| Ba      | 1  |    |    | 3  | 4  | 4  | 4  | 2  | 2  | 4   | 5   | 4   |     | 2   | 6   |
| Al      | 1  |    |    | 2  | 4  | 4  |    | 4  | 2  | 4   |     | 4   |     | 2   | 6   |
| Fe      | 1  | 2  |    | 3  | 4  | 4  | 4  | 4  | 2  | 4   | 5   | 4   |     | 2   | 6   |
| Mn      | 1  | 2  |    | 3  | 2  | 4  | 4  | 4  | 2  |     | 5   | 4   |     | 2   | 6   |
| Cr      | 1  | 2  |    | 2  | 2  | 4  |    | 2  | 2  |     | 5   | 2   | 4   | 2   | 6   |
| Ni      | 1  | 2  |    | 2  | 2  | 4  |    | 2  | 2  | 4   | 5   | 2   | 4   |     | 6   |
| Cu      | 1  | 2  |    | 2  | 2  |    |    | 2  | 2  |     | 5   | 2   | 4   | 2   | 6   |
| Zn      | 1  | 2  |    | 2  | 2  | 4  |    | 2  | 2  | 4   | 5   | 2   | 4   | 2   | 6   |
| As      | 1  | 2  |    |    | 2  | 4  |    | 2  | 2  |     | 5   | 2   | 4   | 2   | 6   |
| Cd      | 1  | 2  |    | 2  | 2  |    |    | 2  | 2  |     | 5   | 2   | 4   | 2   | 6   |
| Pb      | 1  |    |    | 2  | 2  | 4  |    | 2  | 2  |     | 5   | 2   | 4   | 2   | 6   |
| Cl      | 7  | 7  |    | 7  | 7  | 7  |    | 7  | 7  | 7   | 5   | 7   |     | 7   | 6   |
| Br      | 1  | 7  |    | 7  | 7  | 7  |    | 7  | 7  | 7   | 5   | 7   |     | 7   | 6   |
| SO4     | 7  | 7  |    | 7  | 7  | 7  |    | 7  | 7  | 7   | 5   | 7   |     | 7   | 6   |

Table S2. Chemistry of Appalachian Basin O&G wastewaters as reported in the United States Geological Survey's produced water database<sup>1</sup>.

| Analyte | Median | Q1    | Q2     |
|---------|--------|-------|--------|
| Br      | 841    | 327   | 1580   |
| Cl      | 99600  | 51300 | 159000 |
| SO4     | 115    | 20.3  | 337    |
| Na      | 38900  | 22400 | 57500  |
| K       | 840    | 221   | 1740   |
| Mg      | 1920   | 871   | 3530   |
| Ca      | 13600  | 5360  | 27800  |
| Sr      | 813    | 175   | 1290   |
| Ba      | 331    | 45.7  | 1130   |
| Li      | 50.0   | 23.0  | 81.6   |
| B       | 18.1   | 6.77  | 30.6   |
| Al      | 0.80   | 0.25  | 4.00   |
| Fe      | 45.0   | 9.48  | 131    |
| Mn      | 11.7   | 3.00  | 41.0   |
| Ni      | 0.15   | 0.03  | 0.40   |
| Cu      | 0.23   | 0.04  | 0.25   |
| Zn      | 0.80   | 0.12  | 2.00   |
| As      | 0.10   | 0.05  | 0.10   |
| Pb      | 0.03   | 0.02  | 0.03   |
| 226Ra   | 658    | 190   | 1780   |
| 228Ra   | 248    | 39.4  | 821    |

Table S3. Range in percent difference for various analytes in the most recent USGS inter-laboratory comparison for freshwaters<sup>2</sup>. The range in percent difference is based on reported data with acceptable quality (i.e.,  $z < 2$  or  $z > -2$ ).

| Element         | Sample | Units           | MPV  | F    | Acceptable quality concentration range | % difference |
|-----------------|--------|-----------------|------|------|----------------------------------------|--------------|
| Br              | M-226  | mg/L            | 0.06 | 0.03 | 0 - 0.12                               | $>\pm 109$   |
| Cl              | M-226  | mg/L            | 26.2 | 0.96 | 24.3 – 28.1                            | $\pm 7.36$   |
| SO <sub>4</sub> | M-226  | mg/L            | 14.2 | 0.45 | 13.3 – 15.1                            | $\pm 6.27$   |
| Na              | T-233  | mg/L            | 16   | 0.46 | 15.1 – 16.9                            | $\pm 5.70$   |
| K               | T-233  | mg/L            | 1.58 | 0.07 | 1.45 – 1.71                            | $\pm 8.48$   |
| Mg              | T-233  | mg/L            | 6.71 | 0.15 | 6.41 – 7.01                            | $\pm 4.53$   |
| Ca              | T-233  | mg/L            | 16.7 | 0.45 | 15.8 – 17.6                            | $\pm 5.33$   |
| Sr              | T-233  | $\mu\text{g/L}$ | 94   | 3.22 | 87.6 – 100                             | $\pm 6.85$   |
| Ba              | T-233  | $\mu\text{g/L}$ | 27.4 | 0.74 | 25.9 – 28.9                            | $\pm 5.41$   |
| Li              | T-233  | $\mu\text{g/L}$ | 2.57 | 0.03 | 2.52 – 2.62                            | $\pm 2.02$   |
| B               | T-233  | $\mu\text{g/L}$ | 22   | 1.56 | 18.9 – 25.1                            | $\pm 14.2$   |
| Al              | T-233  | $\mu\text{g/L}$ | 481  | 21.5 | 438 – 524                              | $\pm 8.94$   |
| Fe              | T-233  | $\mu\text{g/L}$ | 279  | 10.6 | 258 – 300                              | $\pm 7.60$   |
| Mn              | T-233  | $\mu\text{g/L}$ | 18.5 | 0.96 | 16.6 – 20.4                            | $\pm 10.3$   |
| Ni              | T-233  | $\mu\text{g/L}$ | 1.99 | 0.27 | 1.44 – 2.54                            | $\pm 27.5$   |
| Cu              | T-233  | $\mu\text{g/L}$ | 3.98 | 0.19 | 3.60 – 4.36                            | $\pm 9.60$   |
| Zn              | T-233  | $\mu\text{g/L}$ | 19.7 | 1.85 | 16.0 – 23.4                            | $\pm 18.8$   |
| As              | T-233  | $\mu\text{g/L}$ | 4.10 | 0.22 | 3.66 – 4.54                            | $\pm 10.7$   |
| Pb              | T-233  | $\mu\text{g/L}$ | 0.33 | 0.02 | 0.29 – 0.38                            | $\pm 12.6$   |

Table S4. Elemental ratios (mass/mass) as measured by labs in this study that reported acceptable quality values (i.e., z score that was between -2 and 2 was considered acceptable quality). In instances where no ratios are reported for a lab, the reported values were either of unacceptable or questionable quality or they did not analyze one of the cations or anions needed for calculating the ratio. S1, S2, and S3 represent samples 1, 2, and 3.

| LAB | Cl/Br<br>Sample # |      |      | Sr/Ca<br>Sample # |      |      | B/Cl<br>Sample # |          |          |
|-----|-------------------|------|------|-------------------|------|------|------------------|----------|----------|
|     | S1                | S2   | S3   | S1                | S2   | S3   | S1               | S2       | S3       |
| 1   | 99.1              | 95.1 | 96   |                   | 0.19 | 0.05 |                  | 5.36E-05 | 8.60E-05 |
| 2   | 79.5              | 82.7 | 78.5 |                   |      |      |                  |          |          |
| 3   |                   |      |      | 0.22              | 0.19 | 0.05 |                  |          |          |
| 4   | 92.8              |      | 92.6 | 0.21              | 0.18 | 0.05 | 7.01E-05         |          | 9.76E-05 |
| 5   | 87.0              | 85.7 | 85.7 |                   | 0.20 | 0.05 |                  |          |          |
| 7   |                   |      |      | 0.23              | 0.19 | 0.05 |                  |          |          |
| 8   | 86.7              | 90.6 | 87.2 | 0.21              | 0.18 | 0.05 | 7.73E-05         | 6.09E-05 | 8.65E-05 |
| 9   | 105               | 75.4 | 86.6 |                   | 0.17 | 0.04 | 7.72E-05         | 5.98E-05 | 8.57E-05 |
| 10  |                   |      |      | 0.22              | 0.19 |      |                  |          |          |
| 11  |                   |      | 90.4 |                   |      |      |                  |          |          |
| 13  | 90.9              | 92.9 |      | 0.20              | 0.18 | 0.05 | 7.43E-05         | 7.01E-05 |          |
| 14  | 87.7              | 95.9 | 100  | 0.22              | 0.19 | 0.05 | 7.47E-05         | 6.83E-05 | 8.71E-05 |

Table S5. Methods used for radium analyses in liquids.

| Lab     | Equipment                                                                                            | Sample prep                                                                                                                                                 | Measurement                                                                                                                                                    |
|---------|------------------------------------------------------------------------------------------------------|-------------------------------------------------------------------------------------------------------------------------------------------------------------|----------------------------------------------------------------------------------------------------------------------------------------------------------------|
| Lab 3   | Gamma Spectroscopy                                                                                   | Samples sealed in 55 mL polypropylene jars. Jar threads sealed with vacuum grease. >21 day storage                                                          | $^{226}\text{Ra}$ (609 keV and 351 keV) and $^{228}\text{Ra}$ (911 keV)                                                                                        |
| Lab 4   | Gamma Spectroscopy                                                                                   | >21 day storage. >48 hour counting time. Sealed in 2 oz sediment jar to prevent $^{222}\text{Rn}$ gas release.                                              | $^{226}\text{Ra}$ (186 keV) and $^{228}\text{Ra}$ (911 keV)                                                                                                    |
| Lab 5   | Gamma Spectroscopy                                                                                   | 3 L of sample sealed in 4 L Marinelli beaker. 30 day storage.                                                                                               | $^{226}\text{Ra}$ (weighted average of 609 Kev, 351 keV, 295 keV, and 242 keV), $^{228}\text{Ra}$ (911 keV)                                                    |
| Lab 7a  | Gamma Spectroscopy                                                                                   | No sample prep. Direct counting in 125 mL geometry                                                                                                          | $^{226}\text{Ra}$ (186 keV) and $^{228}\text{Ra}$ (911 keV)                                                                                                    |
| Lab 7b  | Gamma Spectroscopy                                                                                   | Co-precipitation with barium sulfate. $^{133}\text{Ba}$ yield monitor. Precipitate filtered onto 47 mm filter and analyzed on gamma spec.                   | $^{226}\text{Ra}$ (186 keV) and $^{228}\text{Ra}$ (911 keV)                                                                                                    |
| Lab 8   | Low-level proportional counters ( $^{228}\text{Ra}$ ) and radon flask counters ( $^{226}\text{Ra}$ ) | Co-precipitation with barium sulfate ( $^{226}\text{Ra}$ and $^{228}\text{Ra}$ ). EPA methods 904.0 and 903.1                                               | $^{226}\text{Ra}$ ( $^{222}\text{Rn}$ scintillation counting) $^{228}\text{Ra}$ ( $^{228}\text{Ac}$ daughter counted with low background proportional counter) |
| Lab 9   | Canberra LB5100 gas flow counter ( $^{228}\text{Ra}$ ) and EG&G Ortec alpha detectors                | Pre-concentrated with $\text{MnO}_2$ and traced with $^{225}\text{Ra}$ ( $^{226}\text{Ra}$ ) and co-precipitation with barium sulfate ( $^{228}\text{Ra}$ ) | $^{226}\text{Ra}$ (alpha spectrometry) and $^{228}\text{Ra}$ (gas flow proportional counter)                                                                   |
| Lab 10  | Gamma Spectroscopy                                                                                   | Evaporation and analysis of 6 grams of solid.                                                                                                               | $^{226}\text{Ra}$ (186 keV) and $^{228}\text{Ra}$ (911 keV)                                                                                                    |
| Lab 11  | Gamma Spectroscopy                                                                                   | 3.5 L of sample sealed in 4L Marinelli beaker for 21 days. EPA method 901.1.                                                                                | Not reported                                                                                                                                                   |
| Lab 12  | Gamma Spectroscopy                                                                                   | 500 mL. 24 hour counting time.                                                                                                                              | $^{226}\text{Ra}$ (186 keV) and $^{228}\text{Ra}$ (911 keV)                                                                                                    |
| Lab 13  | Gamma Spectroscopy                                                                                   | 20 mL of sample sealed in liquid scintillation vial. EPA method 901.1. Counting time of 4-10 hours.                                                         | $^{226}\text{Ra}$ (351 keV and 609 keV) and $^{228}\text{Ra}$ (911 keV)                                                                                        |
| Lab 14a | Gamma Spectroscopy                                                                                   | 3 L of sample sealed in a 4 L Marinelli beaker. >21 day storage. Counting time of 3 to 18 hours.                                                            | $^{226}\text{Ra}$ (609 keV), $^{228}\text{Ra}$ (911 keV)                                                                                                       |
| Lab 14b | Gamma Spectroscopy                                                                                   | 3 L of sample sealed in a 4 L Marinelli beaker. Direct counting with no storage. Counting time of 3 to 18 hours.                                            | $^{226}\text{Ra}$ (186 keV)                                                                                                                                    |
| Lab 15  | Neutron activation followed by gamma spectroscopy                                                    | Sample evaporation. Counting time of 3 to 18 hours.                                                                                                         | Not reported                                                                                                                                                   |

Table S6. Methods used for Radium analyses in solids.

| Lab #  | Method                                                                                             | Sample prep                                                         | Measurement                                                                                                                                                                                                                                                                                |
|--------|----------------------------------------------------------------------------------------------------|---------------------------------------------------------------------|--------------------------------------------------------------------------------------------------------------------------------------------------------------------------------------------------------------------------------------------------------------------------------------------|
| Lab 3  | Gamma Spectroscopy                                                                                 | Samples were packed into 40 mL jars                                 | Count time of 48 hours. Detector calibrated using Canadian Certified Reference Materials Project. Attenuation correction was performed using the Cutshall point-source technique <sup>3</sup>                                                                                              |
| Lab 4  | Gamma Spectroscopy                                                                                 | Samples were packed in petri dishes and incubated (>21 days)        | Count time of 24-48 hours. Detector calibrated using Canadian Certified Reference Materials Project                                                                                                                                                                                        |
| Lab 5  | Gamma Spectroscopy                                                                                 | Samples were packed into 200 mL HDPE vials                          | Count time of 16.7 hours. Detector calibrated using NIST standards (Eckert and Ziegler)                                                                                                                                                                                                    |
| Lab 7a | Gamma Spectroscopy                                                                                 | Samples were packed into petri dishes                               | Count time of 48 hours. Detector calibrated using Canadian Certified Reference Materials Project. <sup>226</sup> Ra (weighted average of 295, 352, 609 keV) and 463 keV for <sup>228</sup> Ra. Attenuation correction was performed using the Cutshall point-source technique <sup>3</sup> |
| Lab 7b | Gamma Spectroscopy                                                                                 | Samples were packed into petri dishes                               | Count time of 48 hours. Detector calibrated using Canadian Certified Reference Materials Project. <sup>226</sup> Ra at 186 keV and <sup>228</sup> Ra at 911 keV. Attenuation correction was performed using the Cutshall point-source technique <sup>3</sup>                               |
| Lab 8  | Low-level proportional counters ( <sup>228</sup> Ra) and radon flask counters ( <sup>226</sup> Ra) | Digestion according to EPA 3050B. Final liquid volume of 100mL      | Count time of 100 min. <sup>226</sup> Ra ( <sup>222</sup> Radon scintillation counting) <sup>228</sup> Ra ( <sup>228</sup> Ac daughter counted with low background proportional counter)                                                                                                   |
| Lab 9  | Gamma Spectroscopy                                                                                 | Not described                                                       | Count time of 120 min. Detector was calibrated with NIST traceable soil (500g geometry)                                                                                                                                                                                                    |
| Lab 10 | Gamma Spectroscopy                                                                                 | Samples were packed into petri dishes                               | Count time of 24 hours.                                                                                                                                                                                                                                                                    |
| Lab 11 | Gamma Spectroscopy                                                                                 | Samples were packed into 0.5L Marinelli beakers                     | Count time of 1,000 min.                                                                                                                                                                                                                                                                   |
| Lab 13 | Gamma Spectroscopy                                                                                 | Samples were packed into 0.5L Marinelli beakers                     | Count time of 2 hours. Detector calibrated using Eckert and Ziegler standards. <sup>226</sup> Ra at 186 keV, <sup>228</sup> Ra at 911 keV                                                                                                                                                  |
| Lab 14 | Gamma Spectroscopy                                                                                 | Samples were packed in scintillation vials and incubated (>21 days) | Count time of 7-36 hours. Detector calibrated using Canadian Certified Reference Materials Project. <sup>226</sup> Ra by average of <sup>214</sup> Bi at 609.3 keV, <sup>214</sup> Pb at 295.2 keV and 351.9 keV; <sup>228</sup> Ra by <sup>228</sup> Ac at 911.2 keV                      |

## References

1. Blondes, MS.; Gans, KD.; Thordsen, JJ.; Reidy, ME.; Thomas, B.; Engle, MA.; Kharaka, YK.; Rowan, EL. US Geological Survey National Produced Waters Geochemical Database v2. 1 (PROVISIONAL). *United States Geological Survey*. Available at <https://energy.usgs.gov/EnvironmentalAspects/EnvironmentalAspectsofEnergyProductionandUse/ProducedWaters.aspx> (2014).
2. United States Geological Survey. Inter-laboratory comparison study results: Spring 2018. Available at [https://bqs.usgs.gov/srs\\_study/reports/index.php](https://bqs.usgs.gov/srs_study/reports/index.php) (2018).
3. Cutshall, N. H.; Larsen, I. L.; Olsen, C. R., Direct analysis of  $^{210}\text{Pb}$  in sediment samples: self-absorption corrections. *Nuclear Instruments and Methods in Physics Research* **1983**, 206, (1-2), 309-312.
